# Supplementary material for: Telephone-Delivered Interventions for Suicide Prevention in Schizophrenia and Related Disorders: A Systematic Review
Source: MDPI journal article supplement (doi:10.3390/healthcare11030432), 2023-02-02
Supplement: s1 [file s1]

## Supplementary Materials

**Table S1.** Specific search strategy for each database

|                                                                                                                                                                                                                                                                                                                                                                                                                                                                                                                                                                                                                                                                                                                                                                                                                                                                                                                                                                                                                                                                                                                                                                                                                                                                                     |
|-------------------------------------------------------------------------------------------------------------------------------------------------------------------------------------------------------------------------------------------------------------------------------------------------------------------------------------------------------------------------------------------------------------------------------------------------------------------------------------------------------------------------------------------------------------------------------------------------------------------------------------------------------------------------------------------------------------------------------------------------------------------------------------------------------------------------------------------------------------------------------------------------------------------------------------------------------------------------------------------------------------------------------------------------------------------------------------------------------------------------------------------------------------------------------------------------------------------------------------------------------------------------------------|
| <b>PubMed (n = 78)</b>                                                                                                                                                                                                                                                                                                                                                                                                                                                                                                                                                                                                                                                                                                                                                                                                                                                                                                                                                                                                                                                                                                                                                                                                                                                              |
| ("suicide"[MeSH Terms] OR suicid*[Title/Abstract] OR "self-injurious behavior"[MeSH Terms] OR self-injur*[Title/Abstract] OR self-harm*[Title/Abstract] OR "self-destructive behavior"[Title/Abstract] OR self-poisoning[Title/Abstract]) AND ("Schizophrenia"[Mesh Terms] OR schizo*[Title/Abstract] OR "Schizophrenia Spectrum and Other Psychotic Disorders"[Mesh Terms] OR "Psychotic Disorders"[Mesh Terms] OR "psychotic symptom"[Title/Abstract] OR "delusional disorder"[Title/Abstract]) AND ("telemedicine"[MeSH Terms] OR telemedicine[Title/Abstract] OR "telecommunications"[MeSH Terms] OR "telecommunication"[Title/Abstract] OR telehealth[Title/Abstract] OR teleassistance[Title/Abstract] OR telepsychology[Title/Abstract] OR telepsychiatry[Title/Abstract] OR telecare[Title/Abstract] OR telemonitoring[Title/Abstract] OR teleconsult*[Title/Abstract] OR telecounsel*[Title/Abstract] OR "telephone"[MeSH Terms] OR telephon*[Title/Abstract] OR "cell phone"[MeSH Terms] OR phone*[Title/Abstract] OR "phone call"[Title/Abstract] OR "telephone contact"[Title/Abstract] OR "hotlines"[MeSH Terms] OR hotline*[Title/Abstract] OR "call centers"[MeSH Terms] OR helpline*[Title/Abstract] OR lifeline*[Title/Abstract] OR "crisis line"[Title/Abstract]) |
| <b>Web of Science (n = 128)</b>                                                                                                                                                                                                                                                                                                                                                                                                                                                                                                                                                                                                                                                                                                                                                                                                                                                                                                                                                                                                                                                                                                                                                                                                                                                     |
| ((TS=(suicid*) OR TS=("self-injurious behavior") OR TS=(self-injur*) OR TS=(self-harm*) OR TS=("self-destructive behavior") OR TS=(self-poisoning)) AND (TS=(Schizophrenia) OR TS=(schizo*) OR TS=("Schizophrenia Spectrum and Other Psychotic Disorders") OR TS=("Psychotic Disorders") OR TS=("psychotic symptom") OR TS=("delusional disorder"))) AND (TS=(telemedicine) OR TS=(telecommunication*) OR TS=(telehealth) OR TS=(teleassistance) OR TS=(telepsychology) OR TS=(telepsychiatry) OR TS=(telecare) OR TS=(telemonitoring) OR TS=(teleconsult*) OR TS=(telecounsel*) OR TS=(telephon*) OR TS=("cell phone") OR TS=(phone*) OR TS=("phone call") OR TS=("telephone contact") OR TS=(hotline*) OR TS=("call center") OR TS=(helpline*) OR TS=(lifeline*) OR TS=("crisis line")))                                                                                                                                                                                                                                                                                                                                                                                                                                                                                          |

**Scopus (n = 122)**

( TITLE-ABS-KEY ( suicid\* OR "self-injurious behavio\*" OR self-injur\* OR self-harm\* OR "self-destructive behavio\*" OR self-poisoning ) AND TITLE-ABS-KEY ( schizophrenia OR schizo\* OR "Schizophrenia Spectrum and Other Psychotic Disorders" OR "Psychotic Disorders" OR "psychotic symptom\*" OR "delusional disorder\*" ) AND TITLE-ABS-KEY ( telemedicine OR telecommunication\* OR telehealth OR teleassistance OR telepsychology OR telepsychiatry OR telecare OR telemonitoring OR teleconsult\* OR telecounsel\* OR telephon\* OR "cell phone" OR phone\* OR "phone call\*" OR "telephone contact\*" OR hotline\* OR "call center\*" OR helpline\* OR lifeline\* OR "crisis line\*" ) )

**PsycINFO (n = 24)**

(MESH(suicide) OR TI(suicid\*) OR AB(suicid\*) OR IF(suicid\*) OR MESH("self-injurious behavior") OR TI(self-injur\*) OR AB(self-injur\*) OR IF(self-injur\*) OR TI(self-harm\*) OR AB(self-harm\*) OR IF(self-harm\*) OR TI("self-destructive behavio\*") OR AB("self-destructive behavio\*") OR IF("self-destructive behavio\*") OR TI(self-poisoning) OR AB(self-poisoning) OR IF(self-poisoning)) AND (MESH("Schizophrenia") OR TI(schizo\*) OR AB(schizo\*) OR MESH("Schizophrenia Spectrum and Other Psychotic Disorders") OR MESH("Psychotic Disorders") OR TI("psychotic symptom\*") OR AB("psychotic symptom\*") OR IF("psychotic symptom\*") OR TI("delusional disorder\*") OR AB("delusional disorder\*") OR IF("delusional disorder\*")) AND (MESH(telemedicine) OR TI(telemedicine) OR AB(telemedicine) OR IF(telemedicine) OR MESH(telecommunications) OR TI(telecommunication\*) OR AB(telecommunication\*) OR IF(telecommunication\*) OR TI(telehealth) OR AB(telehealth) OR IF(telehealth) OR TI(teleassistance) OR AB(teleassistance) OR IF(teleassistance) OR TI(telepsychology) OR AB(telepsychology) OR IF(telepsychology) OR TI(telepsychiatry) OR AB(telepsychiatry) OR IF(telepsychiatry) OR TI(telecare) OR AB(telecare) OR IF(telecare) OR TI(telemonitoring) OR AB(telemonitoring) OR IF(telemonitoring) OR TI(teleconsult\*) OR AB(teleconsult\*) OR IF(teleconsult\*) OR TI(telecounsel\*) OR AB(telecounsel\*) OR IF(telecounsel\*) OR MESH(telephone) OR MESH(cell phone) OR TI(telephon\*) OR AB(telephon\*) OR IF(telephon\*) OR TI(phone\*))

OR AB(phone\*) OR IF(phone\*) OR TI("phone call\*") OR AB("phone call\*") OR IF("phone call\*") OR TI("telephone contact\*") OR AB("telephone contact\*") OR IF("telephone contact\*") OR MESH(hotlines) OR MESH("call centers") OR TI(hotline\*) OR AB(hotline\*) OR IF(hotline\*) OR TI(helpline\*) OR AB(helpline\*) OR IF(helpline\*) OR TI(lifeline\*) OR AB(lifeline\*) OR IF(lifeline\*) OR TI("crisis line\*") OR AB("crisis line\*") OR IF("crisis line\*")

*Note.* No filters activation was executed in databases.

**Table S2.** List of articles excluded after full-text screening with the corresponding reason of exclusion.

| Articles excluded               |                                                                                                                                                                                      | Reason of exclusion                  |
|---------------------------------|--------------------------------------------------------------------------------------------------------------------------------------------------------------------------------------|--------------------------------------|
| Authors                         | Title                                                                                                                                                                                |                                      |
| Palmier-Claus et al., 2013 [28] | Affective Instability Prior to and after Thoughts about Self-Injury in Individuals With and At-Risk of Psychosis: A Mobile Phone Based Study                                         | No telephone-based intervention.     |
| Henson & Torous, 2020 [29]      | Feasibility and correlations of smartphone meta-data toward dynamic understanding of depression and suicide risk in schizophrenia                                                    | No telephone-based intervention.     |
| Cai et al., 2020 [30]           | Mobile Texting and Lay Health Supporters to Improve Schizophrenia Care in a Resource-Poor Community in Rural China (LEAN Trial): Randomized Controlled Trial Extended Implementation | No telephone-based intervention.     |
| Palmier-Claus et al., 2014 [31] | The Temporal Association Between Self-Injurious Thoughts and Psychotic Symptoms: A Mobile Phone Assessment Study                                                                     | No telephone-based intervention.     |
| Arevian et al., 2020 [32]       | Clinical state tracking in serious mental illness through computational analysis of speech                                                                                           | No suicide-related outcomes.         |
| Dausch et al., 2009 [33]        | Family-focused therapy via videoconferencing                                                                                                                                         | No suicide-related outcomes.         |
| Smelror et al., 2019 [34]       | Feasibility and Acceptability of Using a Mobile Phone App for Characterizing Auditory Verbal Hallucinations in Adolescents With Early-Onset Psychosis: Exploratory Study             | No suicide-related outcomes.         |
| Kasckow et al., 2014 [35]       | Development of Telehealth Dialogues for Monitoring Suicidal Patients with Schizophrenia: Consumer Feedback                                                                           | No quantitative measure of outcomes. |
| Shrivastava et al., 2012 [7]    | Reducing treatment delay for early intervention: evaluation of a community based crisis helpline                                                                                     | No comparison condition.             |
| Böcker, 1984 [36]               | Soziale Integration und Kontakte zu Bezugspersonen des gewohnten sozialen Umfeldes während stationärer Behandlung im psychiatrischen Krankenhaus                                     | Not written in Spanish or English.   |
| Depp et al., 2021 [37]          | A Brief Mobile-Augmented Suicide Prevention Intervention for People With Psychotic Disorders in Transition From Acute to Ongoing Care: Protocol for a Pilot Trial                    | Non-original studies                 |
| Kasckow et al., 2011 [3]        | A telehealth intervention for suicidal patients with schizophrenia                                                                                                                   | Non-original studies                 |
